# Supplementary material for: Protein Persulfidation in Plants: Function and Mechanism
Source: MDPI journal article supplement (doi:10.3390/antiox10101631), 2021-10-16
Supplement: s1 [file s1]

**Supplementary Table S1.** The biosynthesis and degradation of H<sub>2</sub>S in animal and plant cells

|         | <b>Synthetase</b>                                                                                                                                                                      | <b>Synthetase<br/>Substrate</b>                                                                                | <b>Degrading<br/>enzyme</b>                                                                                | <b>References</b>                    |
|---------|----------------------------------------------------------------------------------------------------------------------------------------------------------------------------------------|----------------------------------------------------------------------------------------------------------------|------------------------------------------------------------------------------------------------------------|--------------------------------------|
| Animals | Cystathionine<br>$\gamma$ -lyase (CSE)<br>Cystathionine<br>$\beta$ -synthase (CBS)<br>3-<br>mercaptopyruvate<br>sulfur transferase                                                     | L-cysteine<br><br>L-cysteine and<br>L-homocysteine<br>Thioredoxin<br>(Trx) and<br>dihydrolipoic<br>acid (DHLA) | Sulfide: quinone<br>reductase/<br>Sulfur<br>dioxygenase/<br>Thiosulfate:<br>cyanide sulfur-<br>transferase | [17]                                 |
| Plants  | Desulfhydrase<br>L-Cys (L-CD)<br>D-cysteine<br>Desulfhydrase<br>(D-CD)<br>Cyano alanine<br>synthase (CAS)<br>Sulfite reductase<br>(SiR)<br>O-acetylserine-<br>thiol lyases<br>(OAS-TL) | L-cysteine<br><br>D-cysteine<br><br>Cyanide<br><br>Sulfate<br><br>Cysteine                                     | OAS-TL                                                                                                     | [22]<br><br><br><br><br><br><br>[25] |
